# Supplementary material for: Social Involvement Modulates the Response to Novel and Adverse Life Events in Mice
Source: PubMed Central journal article supplement (PMC5025180; doi:10.1371/journal.pone.0163077), 2016-09-15
Supplement: pone.0163077.s001.pdf [file pone.0163077.s001.pdf]

# Cued and Contextual Fear Conditioning: Extinction as Singles vs. Groups of 3

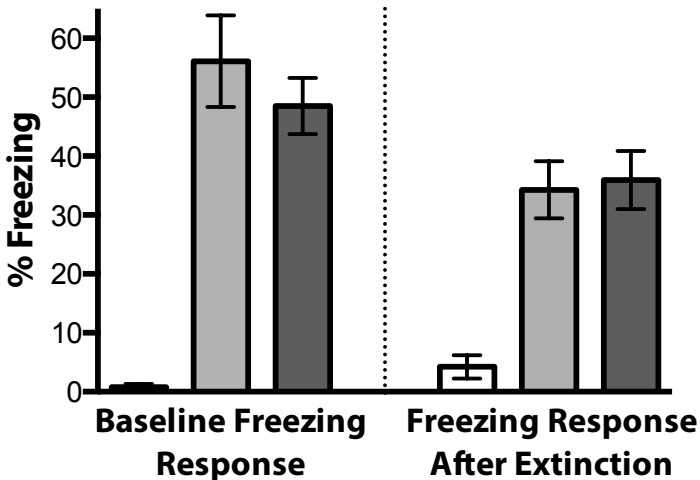

- Single Conditioning/Group Extinction
- Single Conditioning/Single Extinction
- Controls
